# Supplementary material for: Implementation and Outcomes of a Train-the-Trainer Program at Behavioral Health Treatment Centers as a Mechanism to Maintain Organizational Capacity to Address Tobacco Use Disorder
Source: MDPI journal article supplement (doi:10.3390/ijerph182111635), 2021-11-05
Supplement: s1 [file s1]

**Supplemental Table S1.** Participating Local Mental Health Authority and Champions' Pre-Program Implementation Demographic Information.

|        | <b>Total Annual<br/>Patient<br/>Contacts</b> | <b>Unique<br/>Patients<br/>Served<br/>Annually</b> | <b>Number of<br/>Individual<br/>Clinics</b> | <b>Number of<br/>Full-time<br/>Employees</b> | <b>Number of<br/>Full-time<br/>Providers</b> | <b>Counties<br/>Served<br/>(% Rural)</b> | <b>Male Champions<br/>(N/%)</b> |
|--------|----------------------------------------------|----------------------------------------------------|---------------------------------------------|----------------------------------------------|----------------------------------------------|------------------------------------------|---------------------------------|
| LMHA 1 | 92,498                                       | 5,420                                              | 42                                          | 247                                          | 150                                          | 23 (100%)                                | 1 (25.0%)                       |
| LMHA 2 | 229,482                                      | 9,808                                              | 20                                          | 323                                          | 254                                          | 4 (50%)                                  | 1 (33.3%)                       |
| LMHA 3 | 239,672                                      | 11,243                                             | 31                                          | 419                                          | 286                                          | 6 (88.3%)                                | 0 (0%)                          |
